# Supplementary material for: Evaluation of the Phytochemical Composition of Phenolic and Triterpene Compounds in Fruit of Large Cranberries (Vaccinium macrocarpon Aiton) Grown in Latvia
Source: MDPI journal article supplement (doi:10.3390/plants11202725), 2022-10-15
Supplement: s1 [file s1]

Supplementary material:

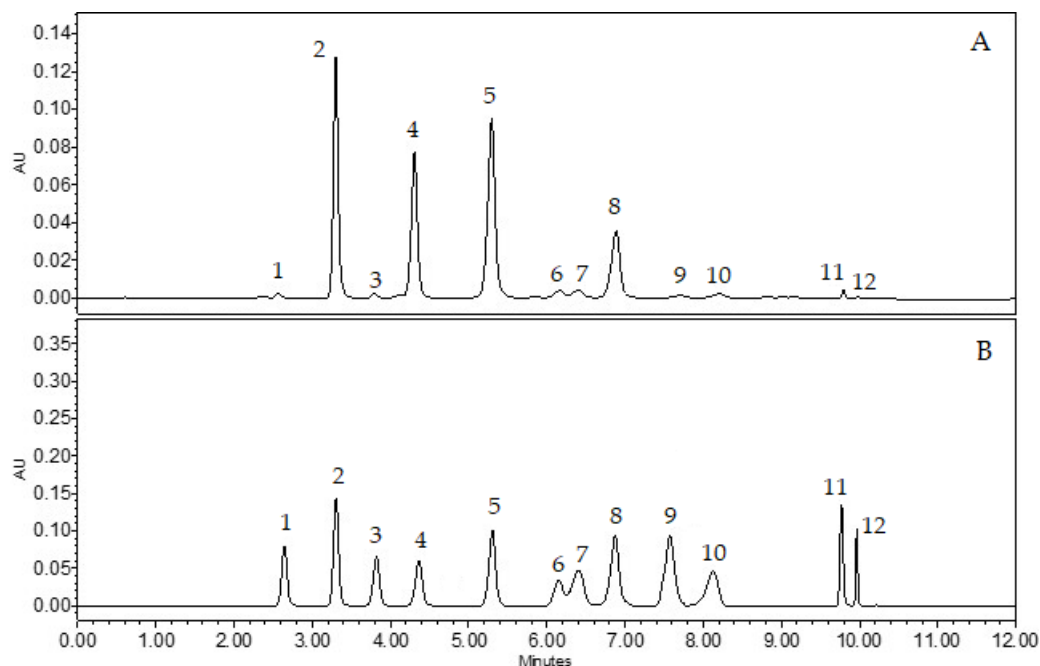

**Figure S1:** UHPLC-PDA chromatogram ( $\lambda = 520$  nm) of the large cranberry extract (A); anthocyanins and anthocyanidins standart mix (B). The compounds of the identified peaks are described in Table S1.

**Table S1.** Linearity parameters of the identified anthocyanins and anthocyanidins.

| Peak | Compound                  | Calibration equation | Linearity range ( $\mu\text{g/mL}$ ) | $R^2$ |
|------|---------------------------|----------------------|--------------------------------------|-------|
| 1    | Delphinidin-3-galactoside | $y = 4900x - 3480$   | 3.91–125.00                          | 0.999 |
| 2    | Cyanidin-3-galactoside    | $y = 4940x - 2370$   | 0.78–125.00                          | 0.999 |
| 3    | Cyanidin-3-glucoside      | $y = 4230x + 1610$   | 3.13–100.00                          | 0.999 |
| 4    | Cyanidin-3-arabinoside    | $y = 4800x + 2220$   | 3.13–100.00                          | 0.999 |
| 5    | Peonidin-3-galactoside    | $y = 5320x + 8770$   | 3.125–100                            | 0.999 |
| 6    | Peonidin-3-glucoside      | $y = 3970x - 1430$   | 0.98–125.00                          | 0.999 |
| 7    | Malvidin-3-galactoside    | $y = 6890x + 3110$   | 3.13–100.00                          | 0.999 |
| 8    | Peonidin-3-arabinoside    | $y = 5940x + 5320$   | 3.125–100                            | 0.999 |
| 9    | Cyanidin                  | $y = 10400x - 1930$  | 0.78–100.00                          | 0.999 |
| 10   | Malvidin-3-arabinoside    | $y = 5950x + 1590$   | 0.78–125.00                          | 0.999 |
| 11   | Peonidin                  | $y = 7010x + 1020$   | 1.56–100.00                          | 0.999 |
| 12   | Malvidin                  | $y = 1150x + 171$    | 3.13–100.00                          | 0.999 |

**Table S2.** Linearity parameters of the identified chlorogenic acid and flavonols.

| Peak | Compound                                   | Calibration equation | Linearity range ( $\mu\text{g/mL}$ ) | $R^2$ |
|------|--------------------------------------------|----------------------|--------------------------------------|-------|
| 1    | Chlorogenic acid                           | $y = 5060x + 570$    | 1.95–62.5                            | 0.999 |
| 2    | Myricetin-3-galactoside                    | $y = 3450x - 396$    | 0.78–100                             | 0.999 |
| 3    | Quercetin-3-galactoside                    | $y = 4880x + 1180$   | 3.13–200                             | 0.999 |
| 4    | Quercetin-3-glucoside                      | $y = 4160x - 61,7$   | 3.13–50                              | 0.999 |
| 5    | Quercetin-3- $\alpha$ -L-arabinopyranoside | $y = 5250x + 861$    | 3.13–50                              | 0.999 |
| 6    | Quercetin-3- $\alpha$ -L-arabinofuranoside | $y = 4170x - 199$    | 3.13–50                              | 0.999 |
| 7    | Quercetin-3-rhamnoside                     | $y = 3690x + 797$    | 3.13–50                              | 0.999 |
| 8    | Myricetin                                  | $y = 5360x - 1240$   | 1.56–50                              | 0.999 |
| 9    | Quercetin                                  | $y = 7450x - 1070$   | 3.13–50                              | 0.999 |

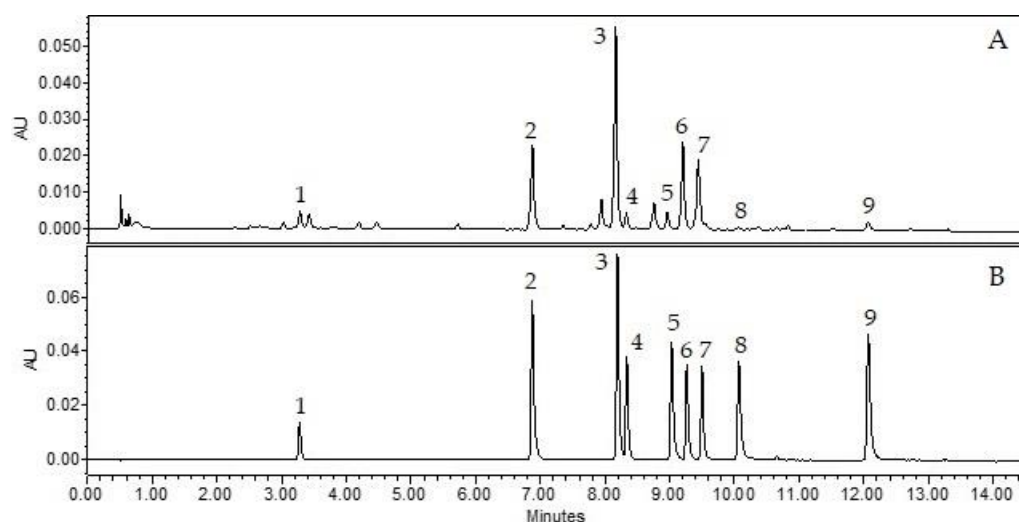

**Figure S2:** UHPLC-PDA chromatogram ( $\lambda = 360$  nm) of the large cranberry extract (A); chlorogenic acid and flavonols standard mix (B). The compounds of the identified peaks are described in Table S2.

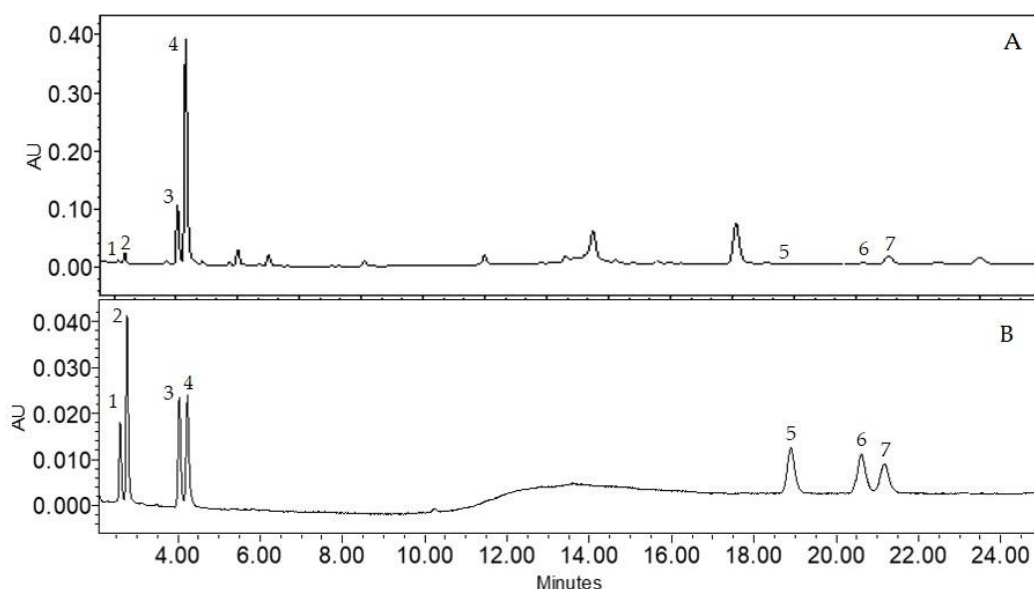

**Figure S3:** UHPLC-PDA chromatogram ( $\lambda = 205.5$  nm) of the large cranberry extract (A);  $\beta$ -Sitosterol and triterpenoids standard mix (B). The compounds of the identified peaks are described in Table S3.

**Table S3.** Linearity parameters of the identified  $\beta$ -Sitosterol and triterpenoids.

| Peak | Compound            | Calibration equation | Linearity range ( $\mu\text{g/mL}$ ) | $R^2$ |
|------|---------------------|----------------------|--------------------------------------|-------|
| 1    | Maslinic acid       | $y = 2790x + 3990$   | 3.125–200                            | 0.999 |
| 2    | Corosolic acid      | $y = 3280x + 750$    | 3.125–200                            | 0.999 |
| 3    | Oleanolic acid      | $y = 3240x + 12900$  | 2.344–600                            | 0.999 |
| 4    | Ursolic acid        | $y = 2930x + 39000$  | 3.906–2000                           | 0.999 |
| 5    | $\beta$ -Amyrin     | $y = 3170x + 6470$   | 6.250–200                            | 0.999 |
| 6    | $\alpha$ -Amyrin    | $y = 3090x - 1030$   | 6.250–200                            | 0.999 |
| 7    | $\beta$ -Sitosterol | $y = 2100x + 4830$   | 6.250–200                            | 0.999 |
